# Supplementary material
Source: Springer Nature journal article supplement (https://www.springermedizin.de/resource/supplementary/12931_2010_1036_MOESM2_ESM.pdf/9425374)

1 agacccccacagttttacgaggggctcagtggtttgccatccagcacatcagt  
R P P Q F T R A Q W F A I Q H I S

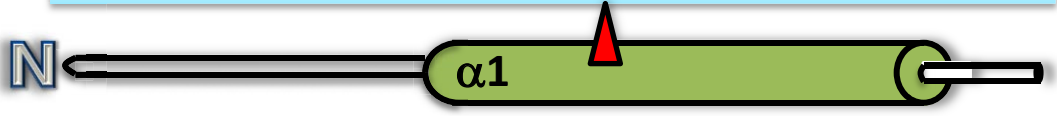

18 ctgaacccccctcgatgcaccattgcaatgcgggcaattaacaattatcga  
L N P P R C T I A M R A I N N Y R

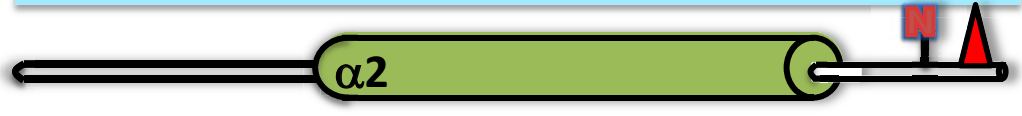

35 tggcgttgcaaaaaccaaatacttttcttcgtacaacttttgctaagtga  
W R C K N Q N T F L R T T F A N V

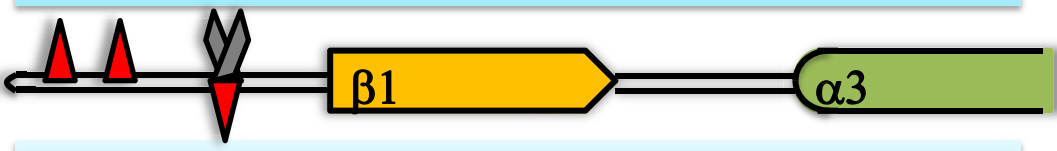

52 gttaatgtttgtggtaaccaaagtatacgtgccttcataacagaactctc  
V N V C G N Q S I R C P H N R T L

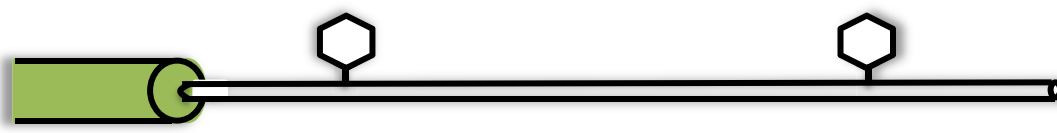

69 aacaattgtcatcggagtagattccgggtgcctttactccactgtgacctc  
N N C H R S R F R V P L L H C D L

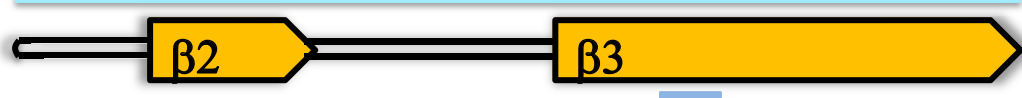

86 ataaatccaggtgcacagaatatttcaaactgcagggtatgcagacagacca  
I N P G A Q N I S N C R Y A D R P  
T

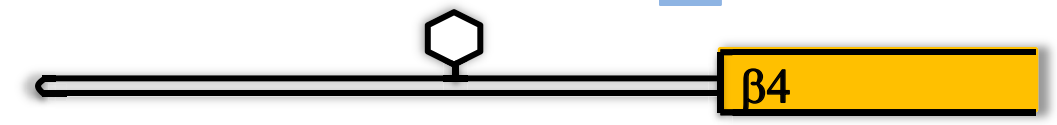

103 ggaaggaggttctatgttagttgcatgtgacaacagagatccacgggattct  
G R R F Y V V A C D N R D P R D S

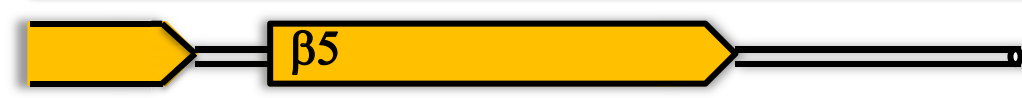

120 ccacgggtatcctgtgggttcagttcacctggataccaccatctaa  
P R Y P V V P V H L D T T I \*

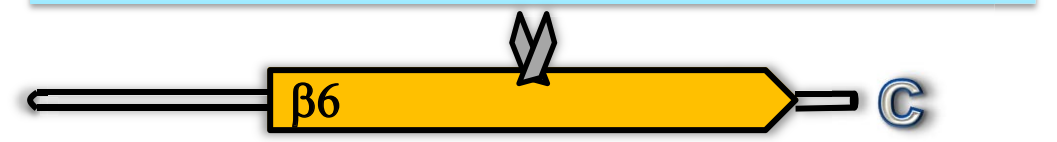

Supplement: MOESM2 [file 9425374]
